# Supplementary material for: Comparing different definitions of prediabetes with subsequent risk of diabetes: an individual participant data meta-analysis involving 76 513 individuals and 8208 cases of incident diabetes
Source: PubMed Central journal article supplement (PMC6936411; doi:10.1136/bmjdrc-2019-000794), 2019-12-29
Supplement: bmjdrc-2019-000794supp001.pdf [file bmjdrc-2019-000794supp001.pdf]

## Online supplementary material

### **Comparing different definitions of pre-diabetes with subsequent risk of diabetes: An individual participant data meta-analysis involving 76,513 individuals and 8208 cases of incident diabetes**

Obesity, Diabetes and Cardiovascular Disease Collaboration

#### **Study investigators**

We would like to thank investigators of the following studies for contributing data to this project: Aichi Workers' Cohort Study (Hiroshi Yatsuya); Atherosclerosis Risk in Communities Study (June Stevens, Elizabeth Selvin); Australian Diabetes, Obesity and Lifestyle Study (Jonathan Shaw, Dianna Magliano); Coronary Artery Risk Development in Young Adults Study (Pamela Schreiner, David Jacobs Jr); Florey Adelaide Male Ageing Study (Gary Wittert, Sean Martin); Geelong Osteoporosis Study (Julie Pasco); Jackson Heart Study (Morgana Mongraw-Chaffin, Alain Bertoni, Joshua Joseph); Melbourne Collaborative Cohort Study (Graham Giles, Allison Hodge, Roger Milne); Mexico City Diabetes Study (Clicerio Gonzalez); Multi-Ethnic Study of Atherosclerosis (Morgana Mongraw-Chaffin, Alain Bertoni); North West Adelaide Health Study (Kay Price, Robert Adams, Tiffany Gill); Prospective Population Study of Women in Gothenburg (Lauren Lissner, Kirsten Mehlig); Tehran Lipid and Glucose Study (Fereidoun Azizi, Davood Khalili); Toyama Prefecture Study (Masaru Sakurai); Uppsala Longitudinal Study of Adult Men (Bjorn Zethelius, Vilmantas Giedraitis); Variability of Insulin with Visceral Adiposity project (Rafael Gabriel);

sTable 1: Characteristics of participants by study: mean (standard deviation) unless stated

| Study                 | Country   | Baseline year | N     | Female (%) | Follow-up (years) | DM incidence cases* | Baseline    |               |                |           |                          |              |                    |                             |
|-----------------------|-----------|---------------|-------|------------|-------------------|---------------------|-------------|---------------|----------------|-----------|--------------------------|--------------|--------------------|-----------------------------|
|                       |           |               |       |            |                   |                     | Age (years) | FPG† (mmol/L) | 2hPG† (mmol/L) | HbA1c (%) | BMI (kg/m <sup>2</sup> ) | SBP (mmHg)   | Current smoker (%) | Family diabetes history (%) |
| <b>AICHI (Ref1)</b>   | Japan     | 2005, 2007    | 5281  | 19.3       | 5.4 (2.0)         | 259                 | 47.4 (7.0)  | 5.1 (0.5)     | -              | -         | 22.9 (2.8)               | 124.3 (16.0) | 24.7               | -                           |
| <b>ARIC (Ref2)</b>    | USA       | 1987-1989     | 12061 | 54.5       | 13.2 (8.1)        | 2286                | 54.0 (5.7)  | 5.5 (0.5)     | -              | -         | 27.2 (5.0)               | 119.7 (18.0) | 25.6               | 22.3                        |
| <b>AUSDIAB (Ref3)</b> | Australia | 1999-2000     | 6558  | 55.0       | 10.1 (3.2)        | 464                 | 50.5 (12.7) | 5.4 (0.6)     | 6.0 (1.8)      | 5.1 (0.3) | 26.7 (4.7)               | 127.8 (17.4) | 12.1               | 18.3                        |
| <b>CARDIA (Ref4)</b>  | USA       | 1985-1986     | 4797  | 55.8       | 21.4 (6.0)        | 626                 | 24.9 (3.6)  | 4.5 (0.5)     | -              | -         | 24.5 (5.0)               | 110.4 (11.1) | 29.1               | 15.5                        |
| <b>FAMAS (Ref5)</b>   | Australia | 2002-2005     | 798   | 0          | 4.9 (0.6)         | 59                  | 53.7 (11.1) | 4.7 (0.7)     | -              | 5.5 (0.4) | 28.3 (4.1)               | 136.4 (18.1) | 17.8               | 27.8                        |
| <b>GOS (Ref6)</b>     | Australia | 1994-1997     | 639   | 100        | 9.5 (1.2)         | 30                  | 47.3 (14.3) | 5.3 (0.5)     | -              | -         | 26.2 (5.1)               | 120.2 (19.8) | 14.4               | 36.0                        |
| <b>JHS (Ref7)</b>     | USA       | 2000-2004     | 3419  | 63.4       | 7.3 (1.8)         | 465                 | 53.6 (12.5) | 5.0 (0.5)     | -              | 5.5 (0.5) | 31.4 (7.2)               | 125.9 (16.1) | 11.8               | 45.5                        |
| <b>MCCS (Ref8)</b>    | Australia | 1990-1994     | 17025 | 61.2       | 11.7 (1.8)        | 1445                | 54.8 (8.4)  | 5.5 (0.5)     | -              | -         | 26.5 (4.2)               | 135.3 (18.1) | 8.3                | 17.6                        |
| <b>MCDS (Ref9)</b>    | Mexico    | 1990-1992     | 1690  | 59.3       | 11.8 (5.8)        | 333                 | 46.3 (8.0)  | 4.6 (0.7)     | 5.9 (2.0)      | -         | 28.1 (4.3)               | 116.6 (16.7) | 32.8               | 32.5                        |

|                       |           |                      |       |      |                |      |                |              |              |              |               |                 |      |      |
|-----------------------|-----------|----------------------|-------|------|----------------|------|----------------|--------------|--------------|--------------|---------------|-----------------|------|------|
| <b>MESA (Ref10)</b>   | USA       | 2000-2002            | 5532  | 53.2 | 7.7<br>(2.7)   | 564  | 51.6<br>(10.2) | 5.0<br>(0.6) | -            | -            | 28.0<br>(5.3) | 125.1<br>(20.9) | 12.8 | -    |
| <b>NWAHS (Ref11)</b>  | Australia | 1999-2000, 2002-2003 | 3062  | 53.2 | 6.7<br>(2.3)   | 155  | 50.4<br>(15.6) | 5.0<br>(0.7) | -            | 5.4<br>(0.5) | 27.7<br>(5.2) | 127.4<br>(17.8) | 20.2 | 10.3 |
| <b>PSWG (Ref12)</b>   | Sweden    | 1968                 | 1320  | 100  | 18.3<br>(7.2)  | 113  | 46.7<br>(6.2)  | 4.1<br>(0.7) | -            | -            | 24.0<br>(3.7) | 132.5<br>(21.3) | 41.8 | 15.2 |
| <b>TLGS (Ref13)</b>   | Iran      | 1999-2001            | 4409  | 57.4 | 11.1<br>(3.7)  | 780  | 41.1<br>(13.9) | 5.0<br>(0.6) | 6.1<br>(2.0) | -            | 26.6<br>(4.6) | 118.0<br>(17.9) | 13.6 | 25.8 |
| <b>TOYAMA (Ref14)</b> | Japan     | 2009                 | 6507  | 33.6 | 5.0<br>(1.4)   | 185  | 41.5<br>(11.8) | 5.2<br>(0.6) | -            | 5.3<br>(0.4) | 22.9<br>(3.3) | 116.8<br>(16.3) | 27.9 | 15.4 |
| <b>ULSAM (Ref15)</b>  | Sweden    | 1970-1973            | 1881  | 0    | 21.7<br>(10.0) | 294  | 49.6<br>(06)   | 4.9<br>(0.5) | -            | -            | 25.0<br>(3.1) | 132.5<br>(17.6) | 34.4 | 15.5 |
| <b>VIVA (Ref16)</b>   | Spain     | 1996-1997            | 1534  | 56.1 | 11.0<br>(1.7)  | 150  | 48.3<br>(8.4)  | 5.1<br>(0.6) | 5.5<br>(1.7) | -            | 27.5<br>(4.4) | 125.2<br>(19.5) | 30.3 | 21.9 |
| <b>Total</b>          |           |                      | 76513 | 51.7 | 11.1<br>(6.3)  | 8208 | 49.6<br>(12.7) | 5.2<br>(0.6) | 6.0<br>(1.9) | 5.3<br>(0.4) | 26.3<br>(5.0) | 125.0<br>(19.1) | 19.1 | 20.8 |

\*Diabetes is defined as FPG  $\geq$  7.0 mmol/L, self-report, or use of anti-diabetic medication;

† To convert from mmol/L to mg/dl: divide value by 0.0555

DM = diabetes mellitus; WHO = World Health Organization; FPG = fasting plasma glucose; ADA = American Diabetes Association; 2hPG = 2 hour post-load plasma glucose; HbA1c = glycated haemoglobin; BMI = body mass index; SBP = systolic blood pressure; AICHI = Aichi Workers' Cohort Study; ARIC = Atherosclerosis Risk in Communities Study; AUSDIAB = Australian Diabetes, Obesity and Lifestyle Study; CARDIA = Coronary Artery Risk Development in Young Adults Study; FAMAS = Florey Adelaide Male Ageing Study; GOS = Geelong Osteoporosis Study; JHS = Jackson Heart Study; MCCS = Melbourne Collaborative Cohort Study; MCDS = Mexico City Diabetes Study; MESA = Multi-Ethnic Study of Atherosclerosis; NWAHS = North

West Adelaide Health Study; PSWG = Prospective Population Study of Women in Gothenburg; TLGS = Tehran Lipid and Glucose Study; TOYAMA = Toyama Prefecture Study; ULSAM = Uppsala Longitudinal Study of Adult Men; VIVA = Variability of Insulin with Visceral Adiposity project;

- Ref1 Yatsuya H, Li Y, Hirakawa Y, Ota A et al. A point system for predicting 10-year risk of developing type 2 diabetes mellitus in Japanese men: Aichi Workers' Cohort Study. *J Epidemiol* 2018;28:347-52.
- Ref2 The ARIC investigators. The Atherosclerosis Risk in Communities (ARIC) Study: design and objectives. *Am J Epidemiol* 1989;129:687-702.
- Ref3 Dunstan DW, Zimmet PZ, Welborn TA et al. The Australian Diabetes, Obesity and Lifestyle Study (AusDiab) – methods and response rates. *Diabetes Res Clin Pract* 2002;57:119-29.
- Ref4 Friedman GD, Cutter GR, Donahue RP et al. CARDIA: Study design, recruitment and some characteristics of the examined subjects. *J Clin Epidemiol* 1988;41:1105-16.
- Ref5 Martin S, Haren M, Taylor A et al. Cohort profile: the Florey Adelaide Male Ageing Study (FAMAS). *Int J Epidemiol* 2007;36:302-6.
- Ref6 Pasco JA, Nicholson GC, Kotowicz MA. Cohort profile: Geelong Osteoporosis Study. *Int J Epidemiol* 2012;41:1565-75.
- Ref7 Sempos CT, Bild DE, Manolio TA. Overview of the Jackson Heart Study: a study of cardiovascular diseases in African American men and women. *Am J Med Sci* 1999;317:142-6.
- Ref8 Milne RL, Fletcher AS, MacInnis RJ et al. Cohort profile: The Melbourne Collaborative Cohort Study (Health 2020). *Int J Epidemiol* 2017;46:1757-1757i.
- Ref9 Gonzalez C, Stern MP, Gonzalez E et al. The Mexico City Diabetes Study: a population-based approach to the study of genetic and environmental interactions in the pathogenesis of obesity and diabetes. *Nutr Rev* 1999;57:S71-6.
- Ref10 Bild DE, Bluemke DA, Burke GL et al. Multi-Ethnic Study of Atherosclerosis: objectives and design. *Am J Epidemiol* 2002;156:871-81.
- Ref11 Grant JF, Taylor AW, Ruffin RE et al. Cohort profile: The North West Adelaide Health Study 9NWAHS). *Int J Epidemiol* 2009;38:1479-86.
- Ref12 Bengtsson C, Ahlqvist M, Andersson K et al. The prospective Population Study of Women in Gothenburg, Sweden, 1968-69 to 1992-93. A 24-year follow-up stud with special reference to participation, representativeness, and mortality. *Scand J Prim Health Care* 1997;15:214-9.
- Ref13 Hadaegh F, Harati H, Ghasemi A et al. Using common clinical data improves the prediction of abnormal glucose tolerance by the new criteria of impaired fasting glucose: Tehran Lipid and Glucose study. *Diabetes Res Clin Pract* 2007;77:459-64.

- Ref14 Sakurai M, Nakamura K, Miura K et al. Dietary carbohydrate intake, presence of obesity and the incident risk of type 2 diabetes in Japanese men. *J Diabetes Investig* 2016;7:343-51.
- Ref15 Lithell H, Sundstrom J, Arnlov J et al. Epidemiological and clinical studies on insulin resistance and diabetes. *Ups J Med Sci* 2000;105:135-50.
- Ref16 Pladevall M, Singal B, Williams LK et al. A single factor underlies the metabolic syndrome. A confirmatory factor analysis. *Diabetes Care* 2006;29:113-22.

**sTable 2: Prediabetes conversion to diabetes by pre-diabetes definition**

| Study          | Pre-diabetes conversion to diabetes (per 1000 person years) |         |      |           |           |
|----------------|-------------------------------------------------------------|---------|------|-----------|-----------|
|                | WHO-FPG                                                     | ADA-FPG | 2hPG | ADA-HbA1c | IEC-HbA1c |
| <b>AICHI</b>   | 87.3                                                        | 36.3    | -    | -         | -         |
| <b>ARIC</b>    | 57.5                                                        | 29.0    | -    | -         | -         |
| <b>AUSDIAB</b> | 36.2                                                        | 15.2    | 30.5 | 87.7      | 154.3     |
| <b>CARDIA</b>  | 20.0                                                        | 15.5    | -    | -         | -         |
| <b>FAMAS</b>   | 113.0                                                       | 80.8    | -    | 48.8      | 95.6      |
| <b>GOS</b>     | 22.4                                                        | 11.2    | -    | -         | -         |
| <b>JHS</b>     | 136.8                                                       | 76.6    | -    | 49.0      | 83.4      |
| <b>MCCS</b>    | 24.6                                                        | 13.5    | -    | -         | -         |
| <b>MCDS</b>    | 92.0                                                        | 69.7    | 54.1 | -         | -         |
| <b>MESA</b>    | 138.4                                                       | 70.3    | -    | -         | -         |
| <b>NWAHS</b>   | 53.3                                                        | 26.3    | -    | 31.0      | 51.1      |
| <b>PSWG</b>    | 49.3                                                        | 18.6    | -    | -         | -         |
| <b>TLGS</b>    | 107.8                                                       | 66.4    | 62.2 | -         | -         |
| <b>TOYAMA</b>  | 99.3                                                        | 36.6    | -    | 42.0      | 113.4     |
| <b>ULSAM</b>   | 32.2                                                        | 17.9    | -    | -         | -         |
| <b>VIVA</b>    | 30.8                                                        | 21.0    | 36.5 | -         | -         |
| <b>Total</b>   | 45.7                                                        | 23.7    | 43.8 | 45.2      | 79.4      |

WHO = World Health Organization; FPG = fasting plasma glucose; ADA = American Diabetes Association; 2hPG = 2 hour post-load plasma glucose; HbA1c = glycated haemoglobin; IEC = International Expert Committee; AICHI = Aichi Workers' Cohort Study; ARIC = Atherosclerosis Risk in Communities Study; AUSDIAB = Australian Diabetes, Obesity and Lifestyle Study; CARDIA = Coronary Artery Risk Development in Young Adults Study; FAMAS = Florey Adelaide Male Ageing Study; GOS = Geelong Osteoporosis Study; JHS = Jackson Heart Study; MCCS = Melbourne Collaborative Cohort Study; MCDS = Mexico City Diabetes Study; MESA = Multi-Ethnic Study of Atherosclerosis; NWAHS = North West Adelaide Health Study; PSWG = Prospective Population Study of Women in Gothenburg; TLGS = Tehran Lipid and Glucose Study; TOYAMA = Toyama Prefecture Study; ULSAM = Uppsala Longitudinal Study of Adult Men; VIVA = Variability of Insulin with Visceral Adiposity project;

**sTable 3: Pooled hazard ratios (HR) and 95% confidence intervals (CI) for incident diabetes associated with pre-diabetes status at baseline by country/geographical region**

| Pre-diabetes definition | Subgroup             | Multiple adjusted* |                        |                    | Heterogeneity between subgroup p-value |
|-------------------------|----------------------|--------------------|------------------------|--------------------|----------------------------------------|
|                         |                      | n                  | Hazard ratio (95% CI)† | I <sup>2</sup> (%) |                                        |
| <b>WHO-FPG</b>          | <b>Australia</b>     | 27368              | 4.67 (3.04, 7.19)      | 89.8               | 0.128                                  |
|                         | <b>Europe</b>        | 4683               | 3.59 (2.67, 4.82)      | 8.8                |                                        |
|                         | <b>Iran</b>          | 4289               | 5.41 (4.45, 6.58)      | -                  |                                        |
|                         | <b>Japan</b>         | 9739               | 12.21 (7.19, 20.74)    | 84.2               |                                        |
|                         | <b>North America</b> | 27072              | 5.92 (3.71, 9.44)      | 95.5               |                                        |
| <b>ADA-FPG</b>          | <b>Australia</b>     | 27368              | 3.56 (2.73, 4.64)      | 75.1               | 0.133                                  |
|                         | <b>Europe</b>        | 4683               | 2.70 (2.20, 3.32)      | 0                  |                                        |
|                         | <b>Iran</b>          | 4289               | 4.98 (4.27, 5.80)      | -                  |                                        |
|                         | <b>Japan</b>         | 9739               | 7.32 (3.88, 13.80)     | 88.0               |                                        |
|                         | <b>North America</b> | 27072              | 4.57 (2.89, 7.24)      | 96.7               |                                        |
| <b>2hPG</b>             | <b>Australia</b>     | 5763               | 4.82 (3.93, 5.91)      | -                  | 0.303                                  |
|                         | <b>Iran</b>          | 3956               | 3.98 (3.38, 4.68)      | -                  |                                        |
|                         | <b>Mexico</b>        | 1644               | 3.20 (2.52, 4.06)      | -                  |                                        |
|                         | <b>Spain</b>         | 1483               | 3.04 (2.17, 4.26)      | -                  |                                        |
| <b>ADA-HbA1c</b>        | <b>Australia</b>     | 9720               | 5.68 (2.77, 11.64)     | 93.5               | 0.505                                  |
|                         | <b>Japan</b>         | 6481               | 29.95 (19.09, 46.99)   | -                  |                                        |
|                         | <b>USA</b>           | 3174               | 5.67 (4.58, 7.02)      | -                  |                                        |
| <b>IEC-HbA1c</b>        | <b>Australia</b>     | 9720               | 6.54 (3.70, 11.57)     | 87.0               | 0.555                                  |
|                         | <b>Japan</b>         | 6481               | 23.35 (16.51, 33.03)   | -                  |                                        |
|                         | <b>USA</b>           | 3174               | 6.26 (5.20, 7.53)      | -                  |                                        |

WHO = World Health Organization; FPG = fasting plasma glucose; ADA = American Diabetes Association; 2hPG = 2 hour post-load plasma glucose; HbA1c = glycated haemoglobin; IEC = International Expert Committee; Europe = Spain, Sweden; North America = Mexico, USA; CI = confidence intervals;

\* Adjusted for age, body mass index, systolic blood pressure, smoking, and family history of diabetes

† Normal (i.e. non pre-diabetes or diabetes) was the reference group, see Table 1 for the respective definitions;

**sTable 4: Pooled hazard ratios (HR) and 95% confidence intervals (CI) for incident diabetes associated with pre-diabetes status at baseline by obesity status**

| Pre-diabetes definition | Subgroup             | Multiple adjusted* |                        |                    | Heterogeneity between subgroup p-value |
|-------------------------|----------------------|--------------------|------------------------|--------------------|----------------------------------------|
|                         |                      | n                  | Hazard ratio (95% CI)† | I <sup>2</sup> (%) |                                        |
| <b>WHO-FPG</b>          | <b>BMI 18.5-24.9</b> | 29924              | 10.49 (7.2, 15.27)     | 83.3               | <0.001                                 |
|                         | <b>BMI 25.0-29.9</b> | 26314              | 6.56 (4.86, 8.86)      | 79.0               |                                        |
|                         | <b>BMI ≥30.0</b>     | 14025              | 4.36 (3.36, 5.68)      | 75.2               |                                        |
| <b>ADA-FPG</b>          | <b>BMI 18.5-24.9</b> | 29924              | 5.92 (4.23, 8.28)      | 85.0               | 0.049                                  |
|                         | <b>BMI 25.0-29.9</b> | 26314              | 4.71 (3.68, 6.04)      | 86.6               |                                        |
|                         | <b>BMI ≥30.0</b>     | 14025              | 3.51 (2.74, 4.49)      | 86.9               |                                        |
| <b>2hPG</b>             | <b>BMI 18.5-24.9</b> | 4485               | 5.71 (3.40, 9.60)      | 60.6               | 0.052                                  |
|                         | <b>BMI 25.0-29.9</b> | 5410               | 4.02 (3.13, 5.17)      | 51.7               |                                        |
|                         | <b>BMI ≥30.0</b>     | 2806               | 3.36 (2.62, 4.32)      | 55.4               |                                        |
| <b>ADA-HbA1c</b>        | <b>BMI 18.5-24.9</b> | 8433               | 13.36 (3.35, 53.35)    | 92.8               | 0.145                                  |
|                         | <b>BMI 25.0-29.9</b> | 6265               | 8.46 (4.07, 17.59)     | 90.7               |                                        |
|                         | <b>BMI ≥30.0</b>     | 4013               | 5.05 (4.23, 6.01)      | 0                  |                                        |
| <b>IEC-HbA1c</b>        | <b>BMI 18.5-24.9</b> | 8433               | 12.51 (3.50, 44.74)    | 92.1               | 0.123                                  |
|                         | <b>BMI 25.0-29.9</b> | 6265               | 10.44 (4.78, 22.80)    | 92.2               |                                        |
|                         | <b>BMI ≥30.0</b>     | 4013               | 5.41 (4.55, 6.43)      | 0                  |                                        |

WHO = World Health Organization; FPG = fasting plasma glucose; ADA = American Diabetes Association; 2hPG = 2 hour post-load plasma glucose; HbA1c = glycated haemoglobin; IEC = International Expert Committee; Europe = Spain, Sweden; North America = Mexico, USA; CI = confidence intervals;

\* Adjusted for age, sex, systolic blood pressure, smoking, and family history of diabetes

† Normal (i.e. non pre-diabetes or diabetes) was the reference group, see Table 1 for the respective definitions;



**sTable 5: Pooled hazard ratios (HR) for incident diabetes<sup>†‡</sup> associated with pre-diabetes status at baseline and Harrell's c-statistics for predicting 5 year risk of diabetes for studies which measured both FPG and 2hPG or FPG and HbA1c, respectively**

| Pre-diabetes definition                                        | Multiple adjusted*    |                    |                       |                    |
|----------------------------------------------------------------|-----------------------|--------------------|-----------------------|--------------------|
|                                                                | Hazard ratio (95% CI) | I <sup>2</sup> (%) | c-statistics (95% CI) | I <sup>2</sup> (%) |
| <b>Based on studied that measured FPG and 2hPG (n=12,844)</b>  |                       |                    |                       |                    |
| <b>WHO-FPG<sup>†</sup></b>                                     | 3.61 (2.63, 4.97)     | 49.2               | 0.738 (0.718, 0.758)  | 0                  |
| <b>ADA-FPG<sup>†</sup></b>                                     | 3.11 (2.35, 4.11)     | 83.1               | 0.757 (0.738, 0.776)  | 0                  |
| <b>2hPG<sup>†</sup></b>                                        | 3.79 (3.12, 4.60)     | 66.8               | 0.792 (0.773, 0.811)  | 0                  |
| <b>Based on studies that measured FPG and HbA1c (n=16,979)</b> |                       |                    |                       |                    |
| <b>WHO-FPG<sup>‡</sup></b>                                     | 5.81 (4.18, 8.06)     | 81.4               | 0.766 (0.719, 0.813)  | 87.3               |
| <b>ADA-FPG<sup>‡</sup></b>                                     | 3.96 (2.82, 5.55)     | 87.8               | 0.770 (0.729, 0.812)  | 85.3               |
| <b>ADA-HbA1c<sup>‡</sup></b>                                   | 6.18 (4.16, 9.18)     | 89.4               | 0.785 (0.754, 0.816)  | 73.7               |
| <b>IEC-HbA1c<sup>‡</sup></b>                                   | 7.13 (4.77, 10.66)    | 88.2               | 0.774 (0.738, 0.811)  | 80.0               |

\*Age, sex, body mass index (BMI), systolic blood pressure, smoking, and family history of diabetes;

<sup>†</sup> Normal (i.e. non pre-diabetes or diabetes) was the reference group, incident diabetes was self-report, use of anti-diabetic medication, FPG  $\geq$ 7.0 mmol/L (126 mg/dl), and/or 2hPG  $\geq$ 11.1 mmol/L (200 mg/dl);

<sup>‡</sup> Normal (I.e. non-pre-diabetes or diabetes) was the reference group, incident diabetes was self-report, use of anti-diabetic medication, FPG  $\geq$ 7.0 mmol/L (126 mg/dl), and/or HbA1c  $\geq$ 6.5% (48 mmol/mol);

WHO = World Health Organization; FPG = fasting plasma glucose; ADA = American Diabetes Association; 2hPG = 2 hour post-load plasma glucose; HbA1c = glycated haemoglobin; IEC = International Expert Committee;

sTable 6: Harrell's c-statistics for predicting 5 year risk of diabetes by sex

| Pre-diabetes definition | Subgroup     | Age adjusted |                        |                    | Multiple adjusted† |                        |                    | Heterogeneity between subgroup p-value |
|-------------------------|--------------|--------------|------------------------|--------------------|--------------------|------------------------|--------------------|----------------------------------------|
|                         |              | n            | c-statistics (95% CI)* | I <sup>2</sup> (%) | n                  | c-statistics (95% CI)* | I <sup>2</sup> (%) |                                        |
| <b>WHO-FPG</b>          | <b>Men</b>   | 35217        | 0.714 (0.680, 0.748)   | 76.7               | 34743              | 0.796 (0.780, 0.813)   | 30.7               | 0.354                                  |
|                         | <b>Women</b> | 38878        | 0.674 (0.643, 0.706)   | 65.2               | 38408              | 0.783 (0.762, 0.804)   | 49.9               |                                        |
| <b>ADA-FPG</b>          | <b>Men</b>   | 35217        | 0.753 (0.724, 0.782)   | 75.7               | 34743              | 0.811 (0.792, 0.831)   | 57.5               | 0.465                                  |
|                         | <b>Women</b> | 38878        | 0.730 (0.700, 0.759)   | 69.0               | 38408              | 0.801 (0.781, 0.820)   | 45.7               |                                        |
| <b>2hPG</b>             | <b>Men</b>   | 5930         | 0.771 (0.733, 0.809)   | 33.5               | 5586               | 0.819 (0.786, 0.853)   | 40.8               | 0.137                                  |
|                         | <b>Women</b> | 7606         | 0.724 (0.655, 0.793)   | 77.5               | 7260               | 0.784 (0.758, 0.809)   | 0                  |                                        |
| <b>ADA-HbA1c</b>        | <b>Men</b>   | 10592        | 0.768 (0.682, 0.855)   | 94.6               | 10300              | 0.818 (0.738, 0.898)   | 94.8               | 0.938                                  |
|                         | <b>Women</b> | 9383         | 0.741 (0.629, 0.853)   | 95.7               | 9075               | 0.822 (0.706, 0.938)   | 98.2               |                                        |
| <b>IEC-HbA1c</b>        | <b>Men</b>   | 10592        | 0.739 (0.674, 0.804)   | 87.0               | 10300              | 0.809 (0.753, 0.864)   | 87.0               | 0.761                                  |
|                         | <b>Women</b> | 9383         | 0.715 (0.594, 0.836)   | 95.3               | 9075               | 0.823 (0.707, 0.938)   | 97.9               |                                        |

WHO = World Health Organization; FPG = fasting plasma glucose; ADA = American Diabetes Association; 2hPG = 2 hour post-load plasma glucose; HbA1c = glycated haemoglobin; IEC = International Expert Committee; CI = confidence intervals;

\* Normal (i.e. non pre-diabetes or diabetes) was the reference group, see Table 1 for the respective definitions;

† Adjusted for age, body mass index, systolic blood pressure, smoking, and family history of diabetes

sTable 7: Harrell's c-statistics for predicting 5 year risk of diabetes by age

| Pre-diabetes definition | Subgroup                | Sex adjusted |                        |                    | Multiple adjusted† |                        |                    | Heterogeneity between subgroup p-value |
|-------------------------|-------------------------|--------------|------------------------|--------------------|--------------------|------------------------|--------------------|----------------------------------------|
|                         |                         | n            | c-statistics (95% CI)* | I <sup>2</sup> (%) | n                  | c-statistics (95% CI)* | I <sup>2</sup> (%) |                                        |
| <b>WHO-FPG</b>          | <b>Age &lt;50 years</b> | 34014        | 0.619 (0.560, 0.678)   | 95.0               | 33646              | 0.800 (0.783, 0.817)   | 17.0               | 0.731                                  |
|                         | <b>Age 50-59 years</b>  | 23755        | 0.673 (0.632, 0.715)   | 80.9               | 23487              | 0.809 (0.736, 0.882)   | 98.3               |                                        |
|                         | <b>Age ≥60 years</b>    | 16225        | 0.680 (0.635, 0.726)   | 75.0               | 15912              | 0.790 (0.759, 0.821)   | 58.0               |                                        |
| <b>ADA-FPG</b>          | <b>Age &lt;50 years</b> | 34014        | 0.699 (0.661, 0.737)   | 75.1               | 33651              | 0.819 (0.795, 0.842)   | 54.6               | 0.551                                  |
|                         | <b>Age 50-59 years</b>  | 23755        | 0.742 (0.713, 0.772)   | 71.6               | 23487              | 0.833 (0.768, 0.899)   | 98.1               |                                        |
|                         | <b>Age ≥60 years</b>    | 16291        | 0.685 (0.605, 0.766)   | 96.8               | 15978              | 0.801 (0.770, 0.832)   | 66.9               |                                        |
| <b>2hPG</b>             | <b>Age &lt;50 years</b> | 8075         | 0.711 (0.665, 0.757)   | 47.6               | 7777               | 0.798 (0.771, 0.825)   | 0                  | 0.290                                  |
|                         | <b>Age 50-59 years</b>  | 3172         | 0.710 (0.668, 0.751)   | 0                  | 3007               | 0.793 (0.758, 0.827)   | 4.9                |                                        |
|                         | <b>Age ≥60 years</b>    | 2289         | 0.734 (0.674, 0.794)   | 38.8               | 2062               | 0.857 (0.727, 0.986)   | 96.0               |                                        |
| <b>ADA-HbA1c</b>        | <b>Age &lt;50 years</b> | 10866        | 0.470 (0.644, 0.836)   | 91.4               | 10634              | 0.827 (0.722, 0.932)   | 95.7               | 0.398                                  |
|                         | <b>Age 50-59 years</b>  | 5168         | 0.720 (0.637, 0.803)   | 90.8               | 5005               | 0.795 (0.741, 0.849)   | 79.2               |                                        |
|                         | <b>Age ≥60 years</b>    | 3941         | 0.732 (0.686, 0.778)   | 68.3               | 3736               | 0.793 (0.745, 0.841)   | 68.6               |                                        |
| <b>IEC-HbA1c</b>        | <b>Age &lt;50 years</b> | 10866        | 0.664 (0.616, 0.713)   | 57.7               | 10634              | 0.805 (0.714, 0.897)   | 92.4               | 0.342                                  |
|                         | <b>Age 50-59 years</b>  | 5168         | 0.699 (0.608, 0.791)   | 89.9               | 5005               | 0.794 (0.769, 0.819)   | 2.1                |                                        |
|                         | <b>Age ≥60 years</b>    | 3941         | 0.693 (0.614, 0.772)   | 84.6               | 3736               | 0.779 (0.749, 0.809)   | 14.4               |                                        |

WHO = World Health Organization; FPG = fasting plasma glucose; ADA = American Diabetes Association; 2hPG = 2 hour post-load plasma glucose; HbA1c = glycated haemoglobin; IEC = International Expert Committee; CI = confidence intervals;

\* Normal (i.e. non pre-diabetes or diabetes) was the reference group, see Table 1 for the respective definitions;

† Adjusted for sex, body mass index, systolic blood pressure, smoking, and family history of diabetes

sTable 8: Harrell's c-statistics for predicting 5 year risk of diabetes by country/geographical region

| Pre-diabetes definition | Subgroup             | Age and sex adjusted |                      |                | Multiple adjusted† |                      |                | Heterogeneity between subgroup p-value |
|-------------------------|----------------------|----------------------|----------------------|----------------|--------------------|----------------------|----------------|----------------------------------------|
|                         |                      | n                    | c-statistics         | I <sup>2</sup> | n                  | c-statistics         | I <sup>2</sup> |                                        |
|                         |                      |                      | (95% CI)*            | (%)            |                    | (95% CI)*            | (%)            |                                        |
| <b>WHO-FPG</b>          | <b>Australia</b>     | 27920                | 0.701 (0.655, 0.747) | 51.9           | 27368              | 0.786 (0.762, 0.809) | 0              | 0.949                                  |
|                         | <b>Europe</b>        | 4735                 | 0.639 (0.561, 0.717) | 0              | 4683               | 0.801 (0.721, 0.880) | 42.7           |                                        |
|                         | <b>Iran</b>          | 4407                 | 0.739 (0.712, 0.766) | -              | 4289               | 0.763 (0.736, 0.789) | -              |                                        |
|                         | <b>Japan</b>         | 9739                 | 0.782 (0.734, 0.830) | 78.7           | 9739               | 0.820 (0.761, 0.879) | 85.4           |                                        |
|                         | <b>North America</b> | 27294                | 0.662 (0.624, 0.701) | 78.7           | 27072              | 0.782 (0.755, 0.810) | 74.6           |                                        |
| <b>ADA-FPG</b>          | <b>Australia</b>     | 27920                | 0.724 (0.692, 0.756) | 26.4           | 27368              | 0.786 (0.762, 0.809) | 0              | 0.709                                  |
|                         | <b>Europe</b>        | 4735                 | 0.752 (0.684, 0.821) | 1.9            | 4683               | 0.845 (0.792, 0.899) | 0              |                                        |
|                         | <b>Iran</b>          | 4407                 | 0.776 (0.750, 0.803) | -              | 4289               | 0.797 (0.771, 0.822) | -              |                                        |
|                         | <b>Japan</b>         | 9739                 | 0.799 (0.752, 0.846) | 75.4           | 9739               | 0.825 (0.771, 0.879) | 84.7           |                                        |
|                         | <b>North America</b> | 27294                | 0.708 (0.661, 0.754) | 88.5           | 27072              | 0.798 (0.777, 0.819) | 61.7           |                                        |
| <b>2hPG</b>             | <b>Australia</b>     | 6297                 | 0.725(0.686, 0.764)  | -              | 5763               | 0.788 (0.755, 0.821) | -              | 0.906                                  |
|                         | <b>Iran</b>          | 4061                 | 0.776 (0.749, 0.804) | -              | 3956               | 0.797 (0.769, 0.825) | -              |                                        |
|                         | <b>Mexico</b>        | 1644                 | 0.687 (0.629, 0.746) | -              | 1644               | 0.790 (0.747, 0.833) | -              |                                        |
|                         | <b>Spain</b>         | 1534                 | 0.702 (0.565, 0.839) | -              | 1483               | 0.800 (0.697, 0.904) | -              |                                        |
| <b>ADA-HbA1c</b>        | <b>Australia</b>     | 10281                | 0.709 (0.685, 0.733) | 0              | 9720               | 0.783 (0.761, 0.805) | 0              | 0.529                                  |
|                         | <b>Japan</b>         | 6481                 | 0.905 (0.879, 0.931) | -              | 6481               | 0.935 (0.920, 0.950) | -              |                                        |
|                         | <b>USA</b>           | 3213                 | 0.730 (0.701, 0.759) | -              | 3174               | 0.770 (0.744, 0.796) | -              |                                        |
| <b>IEC-HbA1c</b>        | <b>Australia</b>     | 10281                | 0.660 (0.587, 0.734) | 85.7           | 9720               | 0.770 (0.730, 0.810) | 66.1           | 0.401                                  |
|                         | <b>Japan</b>         | 6481                 | 0.855 (0.822, 0.887) | -              | 6481               | 0.911 (0.891, 0.932) | -              |                                        |

|            |      |                      |   |      |                      |   |
|------------|------|----------------------|---|------|----------------------|---|
| <b>USA</b> | 3213 | 0.727 (0.692, 0.762) | - | 3174 | 0.782 (0.753, 0.811) | - |
|------------|------|----------------------|---|------|----------------------|---|

WHO = World Health Organization; FPG = fasting plasma glucose; ADA = American Diabetes Association; 2hPG = 2 hour post-load plasma glucose; HbA1c = glycated haemoglobin; IEC = International Expert Committee; Europe = Spain, Sweden; North America = Mexico, USA; CI = confidence intervals;

\* Normal (i.e. non pre-diabetes or diabetes) was the reference group, see Table 1 for the respective definitions;

† Adjusted for age, sex, body mass index, systolic blood pressure, smoking, and family history of diabetes

sTable 9: Harrell's c-statistics for predicting 5 year risk of diabetes by body mass index (BMI) defined obesity status

| Pre-diabetes definition | Subgroup             | Age and sex adjusted |                      |                | Multiple adjusted† |                      |                | Heterogeneity between subgroup p-value |
|-------------------------|----------------------|----------------------|----------------------|----------------|--------------------|----------------------|----------------|----------------------------------------|
|                         |                      | n                    | c-statistics         | I <sup>2</sup> | n                  | c-statistics         | I <sup>2</sup> |                                        |
|                         |                      |                      | (95% CI)*            | (%)            |                    | (95% CI)*            | (%)            |                                        |
| <b>WHO-FPG</b>          | <b>BMI 18.5-24.9</b> | 30247                | 0.749 (0.710, 0.788) | 57.5           | 29924              | 0.795 (0.759, 0.831) | 56.5           | 0.033                                  |
|                         | <b>BMI 25.0-29.9</b> | 26709                | 0.713 (0.695, 0.730) | 0              | 26314              | 0.770 (0.728, 0.812) | 85.6           |                                        |
|                         | <b>BMI ≥30.0</b>     | 14236                | 0.681 (0.655, 0.707) | 43.9           | 14025              | 0.734 (0.698, 0.771) | 77.1           |                                        |
| <b>ADA-FPG</b>          | <b>BMI 18.5-24.9</b> | 30247                | 0.774 (0.736, 0.811) | 59.8           | 29924              | 0.808 (0.775, 0.841) | 54.2           | 0.058                                  |
|                         | <b>BMI 25.0-29.9</b> | 26709                | 0.739 (0.724, 0.754) | 0              | 26314              | 0.795 (0.761, 0.828) | 80.0           |                                        |
|                         | <b>BMI ≥30.0</b>     | 14236                | 0.702 (0.671, 0.734) | 65.2           | 14025              | 0.755 (0.701, 0.809) | 93.1           |                                        |
| <b>2hPG</b>             | <b>BMI 18.5-24.9</b> | 4735                 | 0.823 (0.650, 0.997) | 97.1           | 4485               | 0.785 (0.737, 0.833) | 0              | 0.123                                  |
|                         | <b>BMI 25.0-29.9</b> | 5693                 | 0.746 (0.713, 0.778) | 0              | 5410               | 0.785 (0.755, 0.816) | 0              |                                        |
|                         | <b>BMI ≥30.0</b>     | 2957                 | 0.721 (0.688, 0.753) | 0              | 2806               | 0.747 (0.705, 0.789) | 38.4           |                                        |
| <b>ADA-HbA1c</b>        | <b>BMI 18.5-24.9</b> | 8648                 | 0.767 (0.592, 0.942) | 95.5           | 8433               | 0.804 (0.664, 0.944) | 93.5           | 0.076                                  |
|                         | <b>BMI 25.0-29.9</b> | 6510                 | 0.745 (0.701, 0.788) | 45.1           | 6265               | 0.778 (0.747, 0.809) | 5.9            |                                        |
|                         | <b>BMI ≥30.0</b>     | 4150                 | 0.708 (0.678, 0.739) | 32.0           | 4013               | 0.735 (0.712, 0.757) | 0              |                                        |
| <b>IEC-HbA1c</b>        | <b>BMI 18.5-24.9</b> | 8648                 | 0.748 (0.570, 0.926) | 95.5           | 8433               | 0.790 (0.659, 0.922) | 92.0           | 0.092                                  |
|                         | <b>BMI 25.0-29.9</b> | 6510                 | 0.713 (0.640, 0.787) | 79.2           | 6265               | 0.765 (0.722, 0.807) | 43.4           |                                        |
|                         | <b>BMI ≥30.0</b>     | 4150                 | 0.677 (0.635, 0.719) | 52.0           | 4013               | 0.720 (0.676, 0.764) | 61.5           |                                        |

WHO = World Health Organization; FPG = fasting plasma glucose; ADA = American Diabetes Association; 2hPG = 2 hour post-load plasma glucose; HbA1c = glycated haemoglobin; IEC = International Expert Committee; CI = confidence intervals;

\* Normal (i.e. non pre-diabetes or diabetes) was the reference group, see Table 1 for the respective definitions;

† Adjusted for age, sex, systolic blood pressure, smoking, and family history of diabetes

**sFigure 1: Age- and sex-adjusted pooled hazard ratios (HR) for incident diabetes association with World Health Organization-fasting plasma glucose defined pre-diabetes status (fasting plasma glucose 6.1–6.9 mmol/L (110–124 mg/dl) at baseline**

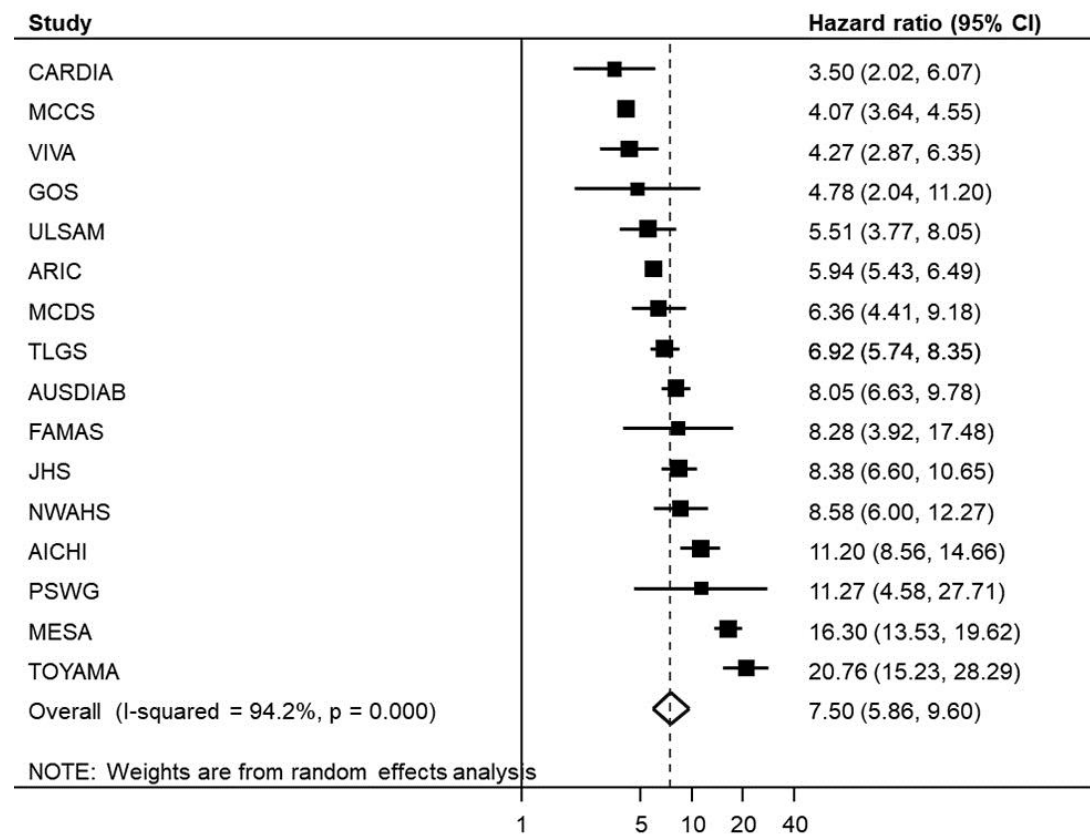

Normal fasting plasma glucose (fasting plasma glucose <6.1 mmol/L (110 mg/dl)) was the reference group;

**sFigure 2: Age- and sex-adjusted pooled hazard ratios (HR) for incident diabetes association with American Diabetes Association-fasting plasma glucose defined pre-diabetes status (fasting plasma glucose 5.6–6.9 mmol/L (101–124 mg/dl) at baseline**

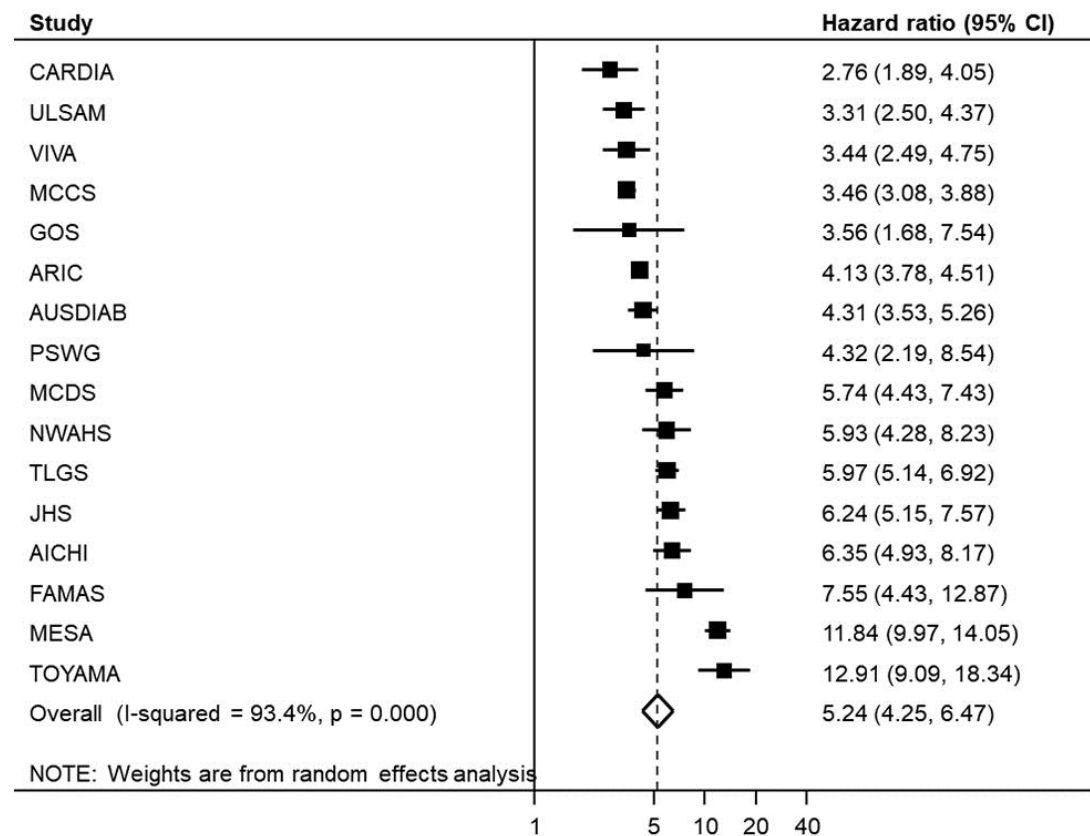

Normal fasting plasma glucose (fasting plasma glucose <5.6 mmol/L (101 mg/dl)) was the reference group;



**sFigure 3: Age- and sex-adjusted pooled hazard ratios (HR) for incident diabetes association with 2 hour postload plasma glucose defined pre-diabetes status (2 hour plasma glucose 7.8–11.0 mmol/L (141–198 mg/dl) at baseline**

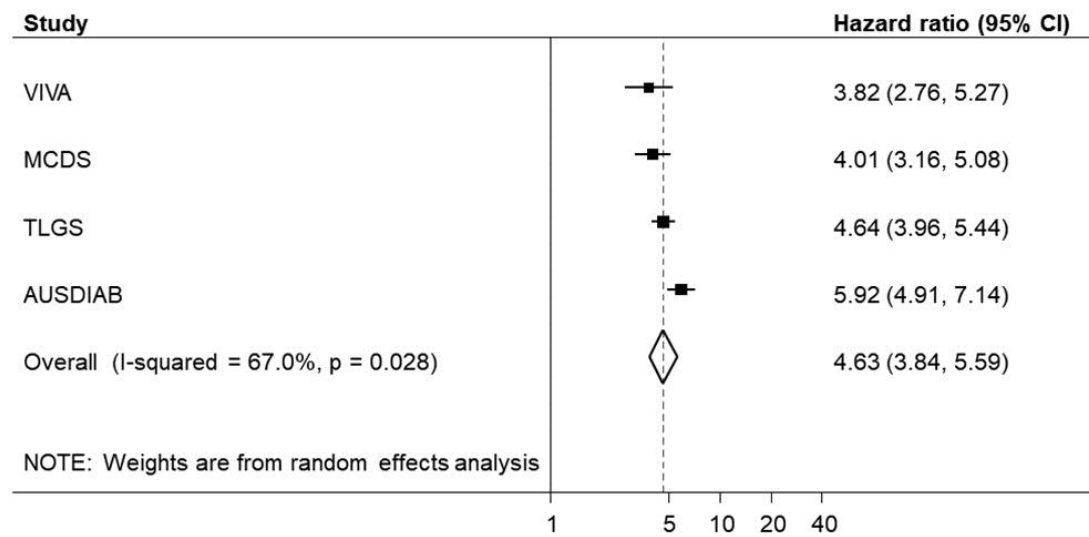

Normal 2 hour plasma glucose (2 hour plasma glucose <7.8 mmol/L (141 mg/dl)) was the reference group;

**sFigure 4: Age- and sex-adjusted pooled hazard ratios (HR) for incident diabetes association with American Diabetes Association-HbA1c defined pre-diabetes status (HbA1c 5.7–6.4% (39–47 mmol/mol)) at baseline**

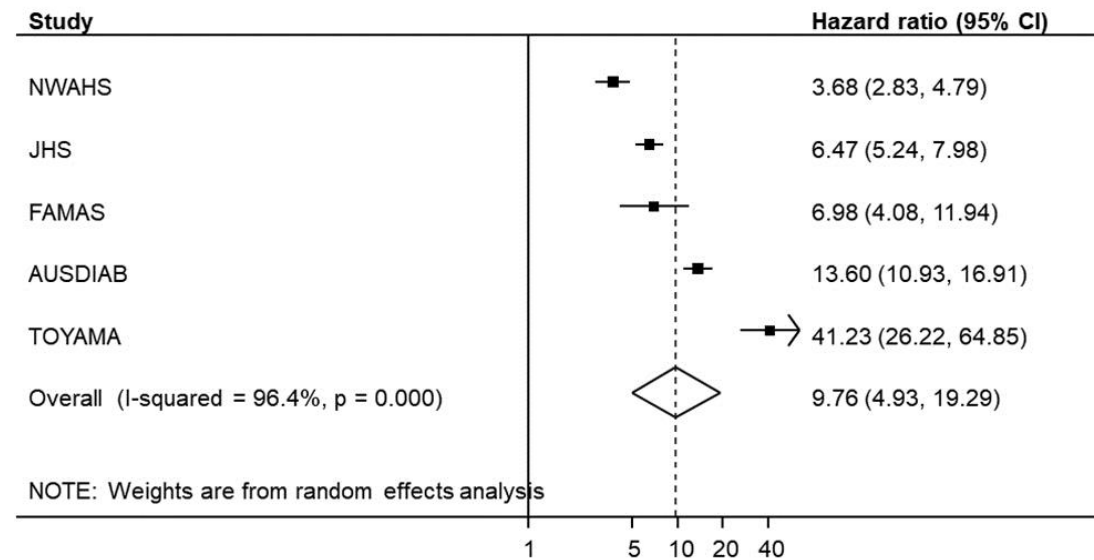

Normal HbA1c (HbA1c <5.7% (39 mmol/mol)) was the reference group;

**sFigure 5: Age- and sex-adjusted pooled hazard ratios (HR) for incident diabetes association with International Expert Committee-HbA1c defined pre-diabetes status (HbA1c 6.0–6.4% (42–47 mmol/mol)) at baseline**

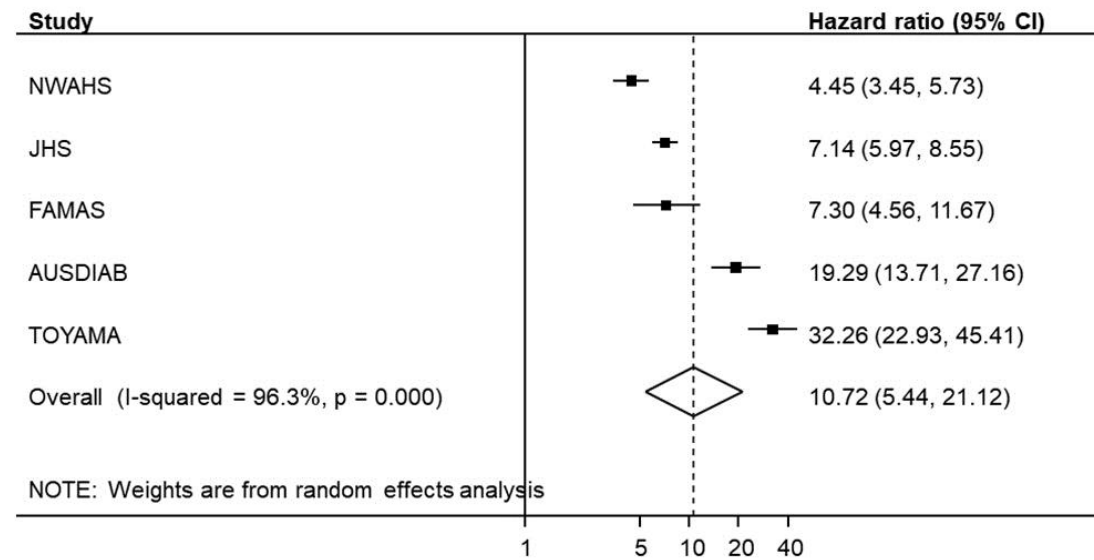

Normal HbA1c (HbA1c < 6.0% (42 mmol/mol)) was the reference group;

**sFigure 6: Age- and sex-adjusted Harrell's c-statistics for predicting 5 year risk of diabetes associated with World Health Organization-fasting plasma glucose defined pre-diabetes status (fasting plasma glucose 6.1–6.9 mmol/L (110–124 mg/dl) at baseline**

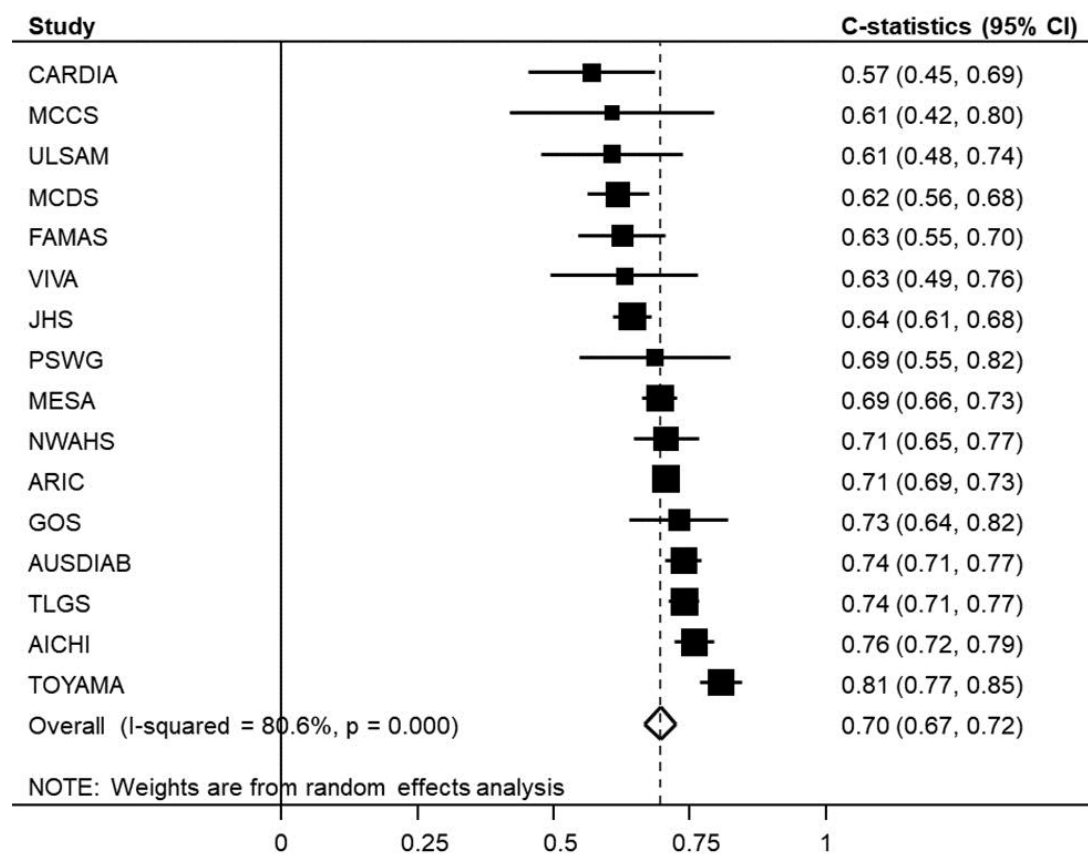

Normal fasting glucose (fasting plasma glucose <6.1 mmol/L (110 mg/dl)) was the reference group;

**sFigure 7: Age- and sex-adjusted Harrell's c-statistics for predicting 5 year risk of diabetes associated with American Diabetes Association-fasting plasma glucose defined pre-diabetes status (fasting plasma glucose 5.6–6.9 mmol/L (101–124 mg/dl) at baseline**

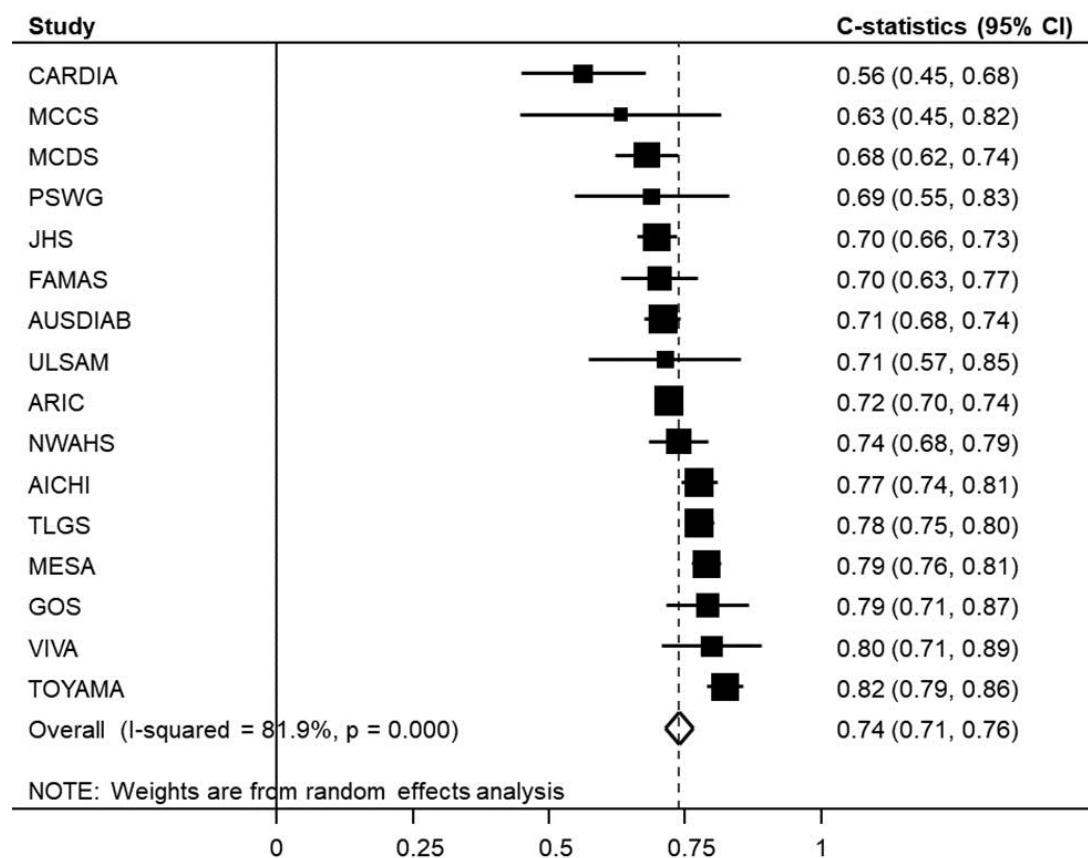

Normal fasting plasma glucose (fasting plasma glucose <5.6 mmol/L (101 mg/dl)) was the reference group;

**sFigure 8: Age- and sex-adjusted Harrell's c-statistics for predicting 5 year risk of diabetes associated with 2 hour postload plasma glucose defined pre-diabetes status (2 hour plasma glucose 7.8–11.0 mmol/L (141–198 mg/dl) at baseline**

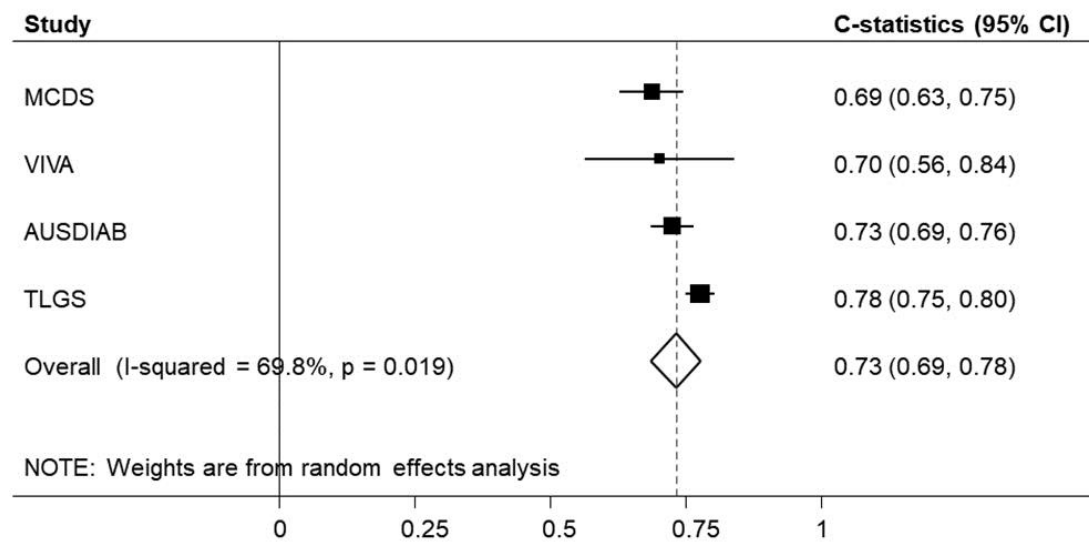

Normal 2 hour plasma glucose (2 hour plasma glucose <7.8 mmol/L (141 mg/dl)) was the reference group;

**sFigure 9: Age- and sex-adjusted Harrell's c-statistics for predicting 5 year risk of diabetes associated with American Diabetes Association-HbA1c defined pre-diabetes status (HbA1c 5.7–6.4% (39–47 mmol/mol)) at baseline**

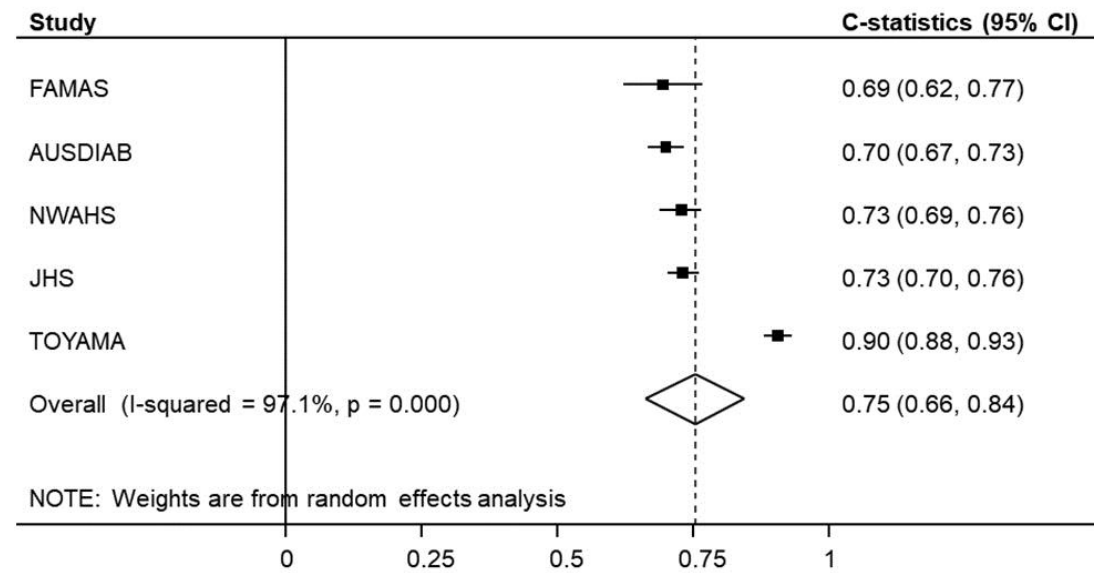

Normal HbA1c (HbA1c <5.7% (39 mmol/mol)) was the reference group;

**sFigure 10: Age- and sex-adjusted Harrell's c-statistics for predicting 5 year risk of diabetes associated with International Expert Committee-HbA1c defined pre-diabetes status ((HbA1c 6.0–6.4% (42–47 mmol/mol)) at baseline**

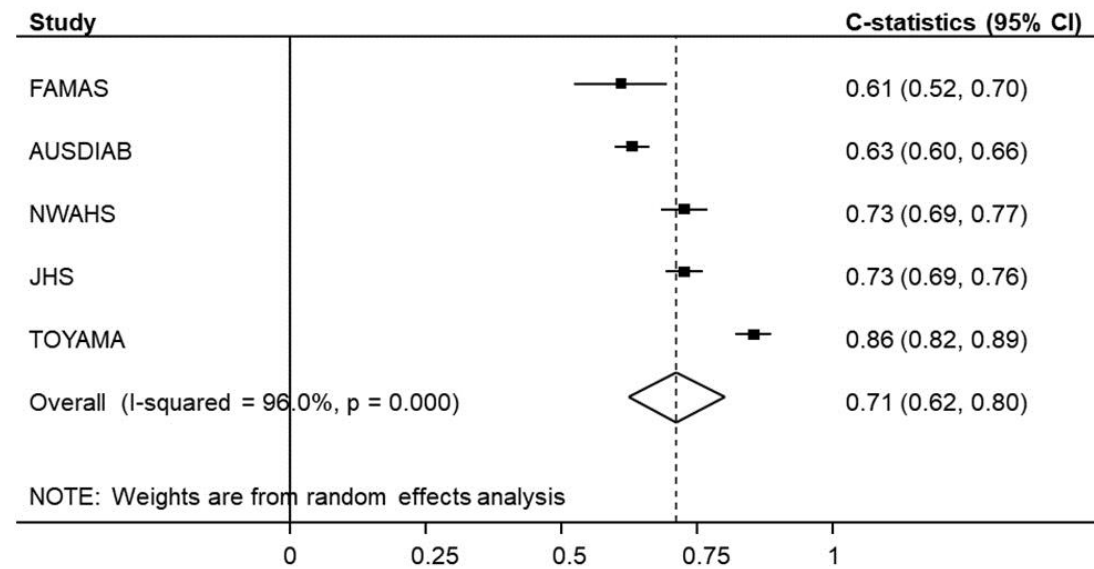

Normal HbA1c (HbA1c < 6.0% (42 mmol/mol)) was the reference group;



**sFigure 11: Relationships between each of three measures of glycaemia and incident diabetes**

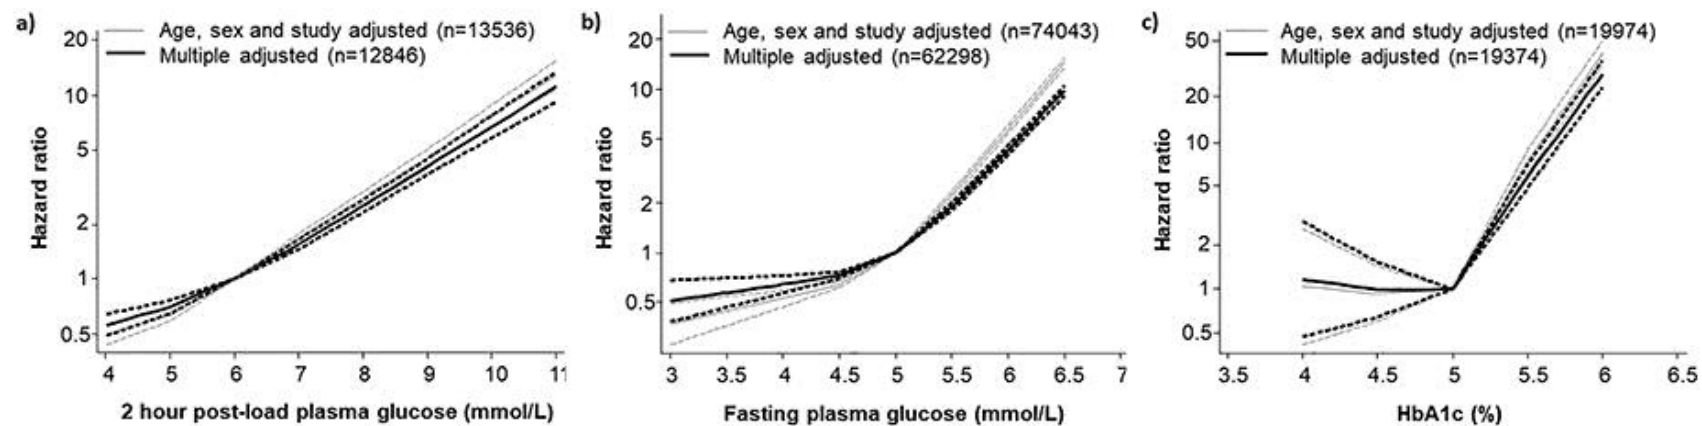

a) Knots at fasting plasma glucose (FPG) 4.2, 4.9, 5.4, and 6.2 mmol/L (76, 88, 97, 112 mg/dl) and reference at 5.0 mmol/L (90 mg/dl); b) knots at 2 hour post-load plasma glucose (2hPG) 3.4, 5.1, 6.2, and 8.9 mmol/L (61, 92, 112, 160 mg/dl) and reference at 6.0 mmol/L (108 mg/dl); c) knots at HbA1c 4.7, 5.1, 5.4, and 6.0% and reference at 5.0%;

Multiple adjusted = adjusted for age, sex, study, body mass index, systolic blood pressure, smoking, and family history of diabetes;
